# Supplementary material for: Synthesis of new copper(i) complexes with tris(2-pyridyl) ligands. Applications to carbene and nitrene transfer reactions
Source: Royal Society of Chemistry journal article supplement (doi:10.1039/b812604f), 2008-11-14
Supplement: b812604f.pdf [file b812604f.pdf]

Supplementary Information

**Synthesis of new copper (I) complexes with tris(2-pyridyl) ligands. Applications to carbene and nitrene transfer reactions.**

**Julio Pérez, Dolores Morales, Luis A. García Escudero, Héctor Martínez-García, Daniel Miguel and Pablo Bernad**

**Table 1. Crystallographic Data for 4 and 5.**

|                                                                                    | <b>4</b>                                                                                                      | <b>5</b>                                                                         |
|------------------------------------------------------------------------------------|---------------------------------------------------------------------------------------------------------------|----------------------------------------------------------------------------------|
| formula                                                                            | C <sub>102</sub> H <sub>64</sub> B <sub>2</sub> Cu <sub>2</sub> F <sub>48</sub> N <sub>8</sub> O <sub>2</sub> | C <sub>31</sub> H <sub>24</sub> CuF <sub>3</sub> N <sub>8</sub> O <sub>3</sub> S |
| fw                                                                                 | 2494.31                                                                                                       | 709.18                                                                           |
| cryst system                                                                       | triclinic                                                                                                     | monoclinic                                                                       |
| space group                                                                        | P-1                                                                                                           | P2(1)/n                                                                          |
| <i>a</i> , Å                                                                       | 11.330(3)                                                                                                     | 8.4385(18)                                                                       |
| <i>b</i> , Å                                                                       | 14.574(4)                                                                                                     | 17.821(4)                                                                        |
| <i>c</i> , Å                                                                       | 18.019(5)                                                                                                     | 20.819(5)                                                                        |
| $\alpha$ , deg                                                                     | 67.429(5)                                                                                                     | 90                                                                               |
| $\beta$ , deg                                                                      | 76.811(6)                                                                                                     | 96.231(4)                                                                        |
| $\gamma$ , deg                                                                     | 88.813(6)                                                                                                     | 90                                                                               |
| <i>V</i> , Å <sup>3</sup>                                                          | 2667.8(12)                                                                                                    | 3112.4(12)                                                                       |
| <b>Z</b>                                                                           | 1                                                                                                             | 4                                                                                |
| <i>T</i> , K                                                                       | 293(2)                                                                                                        | 296(2)                                                                           |
| <i>D<sub>c</sub></i> , g cm <sup>-3</sup>                                          | 1.553                                                                                                         | 1.513                                                                            |
| F(000)                                                                             | 1248                                                                                                          | 1448                                                                             |
| $\lambda$ (MoK $\alpha$ ), Å                                                       | 0.71073                                                                                                       | 0.71073                                                                          |
| crystal size, mm                                                                   | 0.26x 0.17x 0.11                                                                                              | 0.36x 0.10x 0.09                                                                 |
| $\mu$ , mm <sup>-1</sup>                                                           | 0.535                                                                                                         | 0.834                                                                            |
| scan range, deg                                                                    | 1.26 $\leq\theta\leq$ 23.33                                                                                   | 1.51 $\leq\theta\leq$ 23.32                                                      |
| refl. measured                                                                     | 12075                                                                                                         | 13877                                                                            |
| indep. refl.                                                                       | 7624                                                                                                          | 4483                                                                             |
| data/restraints/<br>parameters                                                     | 7624 / 0 / 719                                                                                                | 4383 / 0 / 424                                                                   |
| goodness-of-fit on F <sup>2</sup>                                                  | 1.090                                                                                                         | 1.001                                                                            |
| <i>R</i> <sub>1</sub> / <i>R</i> <sub>w2</sub> [ <i>I</i> $>2\sigma$ ( <i>I</i> )] | 0.1209/ 0.2782                                                                                                | 0.0422/ 0.1008                                                                   |
| <i>R</i> <sub>1</sub> / <i>R</i> <sub>w2</sub> (all data)                          | 0.2040/0.3130                                                                                                 | 0.0660/0.1094                                                                    |

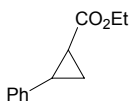

Pérez, P. J.; Brookhart, M.; Templeton, J. L. *Organometallics* 1993, **12**, 261.

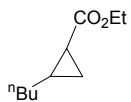

Barret, A. G. M.; Braddock, D. C.; Lenoir, I.; Tone, H. *J. Org. Chem.* 2001, **66**, 8260.

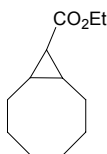

Pérez, P. J.; Brookhart, M.; Templeton, J. L. *Organometallics* 1993, **12**, 261.

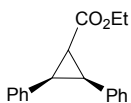

Merlic, C. A.; Walsh, J. C.; Tantillo, D. J.; Houk, K. N. *J. Am. Chem. Soc.* 1999, **121**, 3596.

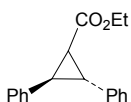

Pérez, P. J.; Brookhart, M.; Templeton, J. L. *Organometallics* 1993, **12**, 261.

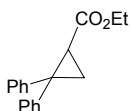

Lou, Y.; Horikawa, M.; Kloster, R. A.; Hawryluk, N. A.; Corey, E. J. *J. Am. Chem. Soc.* 2004, **126**, 8916.

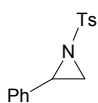

Dias, H. V. R.; Lu, H. L.; Kim, H. J.; Polach, S. A.; Goh, T. K. H.; Browning, R. G.; Lovely, C. J. *Organometallics* 2002, **21**, 1466.

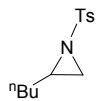

Evans, D. A.; Bidoleau, M. T.; Faul, M. M. *J. Am. Chem. Soc.* 1994, **116**, 2742.

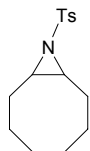

Mahy, J. P.; Bedi, G.; Battioni, P.; Mansuy, D. J. *Chem. Soc., Perkin Trans. 2* 1988, 1517.

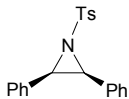

Evans, D. A.; Bilodeau, M. T.; Faul, M. M. *J. Am. Chem. Soc.* 1994, **116**, 2742.

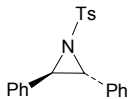

Cui, Y.; He, C. *J. Am. Chem. Soc.* 2003, **125**, 16202.

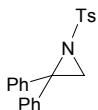

Han, J.; Li, Y.; Zhi, S.; Pan, Y.; Timmons, C.; Li, G. *Tetrahedron Lett.* 2006, **47**, 7225.

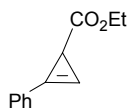

Petiniot, N.; Anciaux, A. J.; Noels, A. F.; Hubert, A. J.; Teyssie, P. *Tetrahedron Lett.* 1978, 1239.

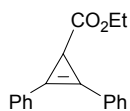

Mueller, P.; Pautex, N.; Doyle, M. P.; Bagheri, V. *Helv. Chim. Acta* 1990, **73**, 1233.

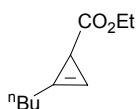

Mueller, P.; Pautex, N.; Doyle, M. P.; Bagheri, V. *Helv. Chim. Acta* 1990, **73**, 1233.

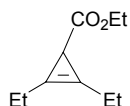

Richey, H. G. Jr.; Bension, R. M. *J. Org. Chem.* 1980, **45**, 5036.

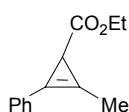

Müller, P.; Gränicher, C. *Helv. Chim. Acta.* 1993, **114**, 521.

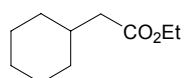

The NMR data were compared with those of a commercial sample .

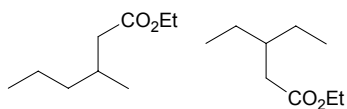

Urbano, J.; Belderráin, T. R.; Nicasio, M. C.; Trofimenko, S.; Díaz-Requejo, M. M.; Pérez, P. J. *Organometallics* 2005, **24**, 1528.

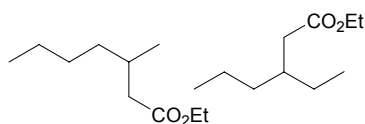

Caballero, A.; Díaz-Requejo, M. M.; Belderráin, T. R.; Nicasio, M. C.; Trofimenko, S.; Pérez, P. J. *Organometallics* 2003, **22**, 4145.

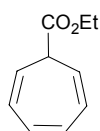

Morilla, M. E.; Díaz-Requejo, M. M.; Belderráin, T. R.; Nicasio, M. C.; Trofimenko, S.; Pérez, P. J. *Organometallics* 2004, **23**, 293.

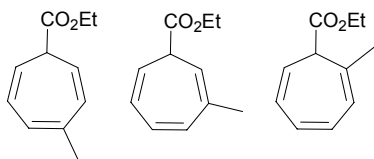

Morilla, M. E.; Díaz-Requejo, M. M.; Belderráin, T. R.; Nicasio, M. C.; Trofimenko, S.; Pérez, P. J. *Organometallics* 2004, **23**, 293.

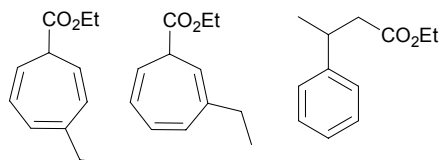

Morilla, M. E.; Díaz-Requejo, M. M.; Belderráin, T. R.; Nicasio, M. C.; Trofimenko, S.; Pérez, P. J. *Organometallics* 2004, **23**, 293.

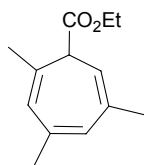

Morilla, M. E.; Díaz-Requejo, M. M.; Belderrain, T. R.; Nicasio, M. C.; Trofimenko, S.; Pérez, P. J. *Organometallics* 2004, **23**, 293.

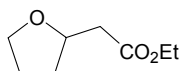

Caballero, A.; Díaz-Requejo, M. M.; Belderrain, T. R.; Nicasio, M. C.; Trofimenko, S.; Pérez, P. J. *Organometallics* 2003, **22**, 4145.

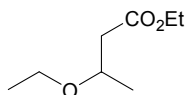

Caballero, A.; Díaz-Requejo, M. M.; Belderrain, T. R.; Nicasio, M. C.; Trofimenko, S.; Pérez, P. J. *Organometallics* 2003, **22**, 4145.

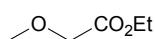

Zhu, Z.; Espenson, J. H. *J. Am. Chem. Soc.* 1996, **118**, 9901.

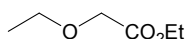

Zhu, Z.; Espenson, J. H. *J. Am. Chem. Soc.* 1996, **118**, 9901.

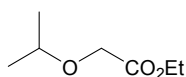

Zhu, Z.; Espenson, J. H. *J. Am. Chem. Soc.* 1996, **118**, 9901.

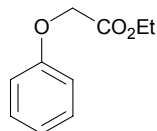

Zhu, Z.; Espenson, J. H. *J. Am. Chem. Soc.* 1996, **118**, 9901.

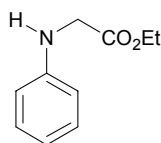

Zhu, Z.; Espenson, J. H. *J. Am. Chem. Soc.* 1996, **118**, 9901.  
Hi, K. K.; Thornton-Pett, M.; Jutand, A.; Tooze, R. P. *Organometallics* 1999, **18**, 1887.

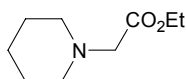

Zhu, Z.; Espenson, J. H. *J. Am. Chem. Soc.* 1996, **118**, 9901.

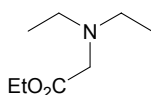

Baumann, L. K.; Mbuji, H. M.; Du, G.; Woo, L. K. *Organometallics* 2007, **26**, 3995.

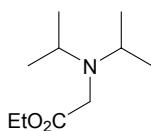

Zhu, Z.; Espenson, J. H. *J. Am. Chem. Soc.* 1996, **118**, 9901.
